# Supplementary material for: Solid-state hydrogen bonded assembly of N,N′-bis(glycinyl)-pyromellitic diimide with aromatic guests
Source: Royal Society of Chemistry journal article supplement (doi:10.1039/b607323a), 2006-01-01
Supplement: b607323a.pdf [file b607323a.pdf]

## Supplementary materials

Solid-state hydrogen bonded assembly of *N,N'*-bis(glyciny)l-pyromellitic diimide with aromatic guests

Nilotpal Barooah, Rupam J. Sarma, Jubaraj B. Baruah

### UV-visible spectra of inclusion compounds (2-4)

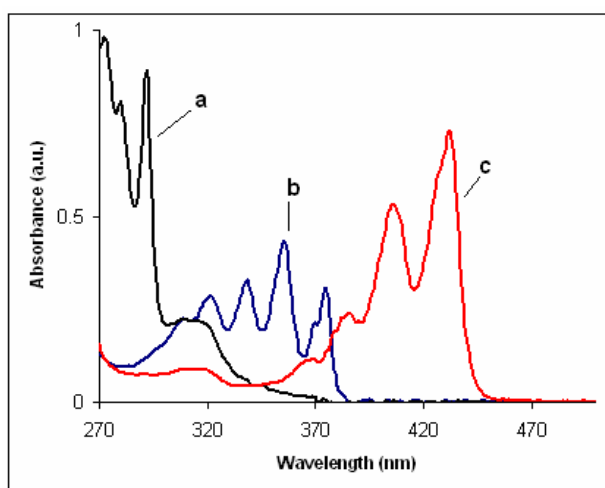

Fig. S1 UV-visible spectra of adduct of *N,N'*-bis(glyciny)lpyromellitic diimide with a) phenanthrene, b) anthracene, c) perylene (in methanol  $10^{-5}$  mM each)

**Fluorescence Titration:**

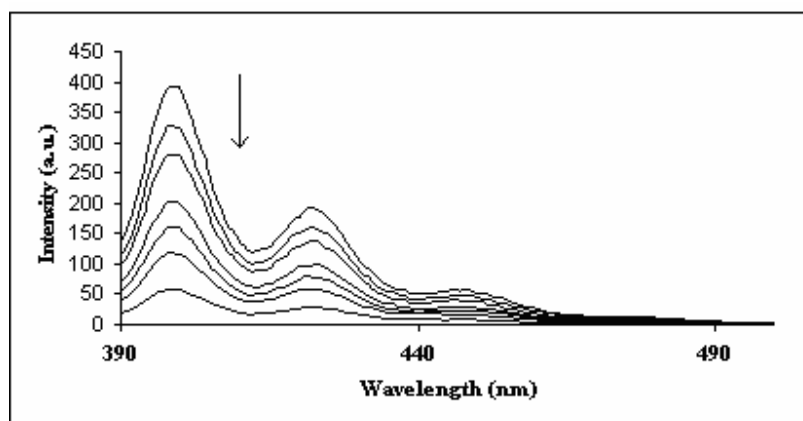

Fig S2 Fluorescence emission of anthracene in methanol ( $10^{-8}$ M) with increasing concentration of *N,N'*-bis(glyciny)pyromellitic diimide (with 0.05 equivalent increment in each aliquot, excitation at 380nm)

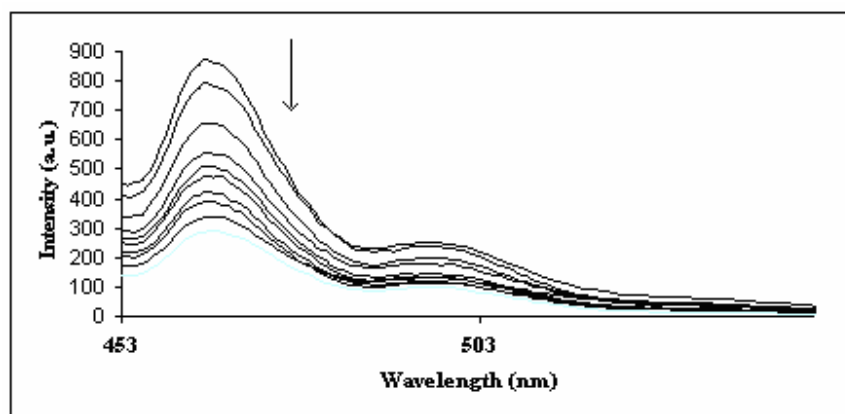

Fig. S3 Fluorescence emission of perylene ( $10^{-8}$  M) with increasing concentration of *N,N'*-bis(glyciny)pyromellitic diimide (with 0.05 equivalent increment in each aliquot, excitation at 320 nm)

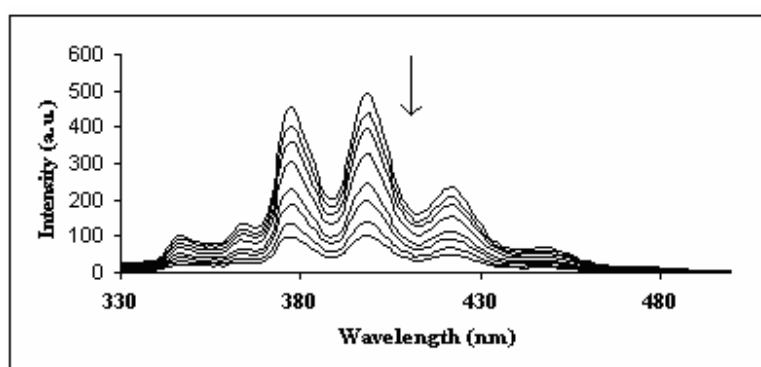

Fig. S4 Fluorescence emission of phenanthrene in methanol ( $10^{-8}$  M) with increasing concentration of *N,N'*-bis(glyciny)pyromellitic diimide (with 0.05 equivalent increment in each aliquot, excitation at 433 nm)
